# Supplementary material
Source: ML conference proceedings conference paper supplement (https://proceedings.mlr.press/v77/zhang17c.html)
Supplement: Supplementary file 1 [file zhang17c-supp.pdf]

# ST-GAN: Unsupervised Facial Image Semantic Transformation Using Generative Adversarial Networks

## Appendix A. The objective functions of WGAN-GP

For  $D$  network:

$$\begin{aligned} \min_D L_{GAN} &= \mathbb{E}_{z \sim P_z(z), c \sim P_c(c)} [D(G(z, c))] - \mathbb{E}_{x \sim P_{data}(x)} [D(x)] \\ &+ \lambda \mathbb{E}(t), \end{aligned} \quad (1)$$

where  $t = (\|\nabla_{\hat{x}} D(\hat{x})\|_2 - 1)^2$ . Here,  $\hat{x} = \epsilon x + (1 - \epsilon)\tilde{x}$ , where  $\epsilon \sim U[0, 1]$ ,  $x \sim P_{data}(x)$ ,  $\tilde{x} \sim P_G(x)$ .

For  $G$  network:

$$\min_G L_{GAN} = \mathbb{E}_{x \sim P_{data}(x)} [D(x)] - \mathbb{E}_{z \sim P_z(z), c \sim P_c(c)} [D(G(z, c))] \quad (2)$$

## Appendix B. Mutual information term

The mutual information term  $I(c; G(z, c))$  requires the posterior  $P(c|G(z, c))$ , thus, it is hard to maximize directly. ST-GAN uses a technique called Variational Information Maximization [Barber and Agakov \(2003\)](#) by defining an auxiliary distribution  $Q(c|x)$  to approximate  $P(c|x)$  as InfoGAN [Chen et al. \(2016\)](#) does. The variational lower bound,  $L_I(G, Q)$ , of the local mutual information  $I(c; G(z, c))$  is defined as:

$$\begin{aligned} L_I(G, Q) &= \mathbb{E}_{c \sim P(c), x \sim G(z, c)} [\log Q(c|x)] + H(c) \\ &= \mathbb{E}_{x \sim G(z, c)} [\mathbb{E}_{c' \sim P(c|x)} [\log Q(c'|x)]] + H(c) \\ &\leq I(c; G(z, c)) \end{aligned} \quad (3)$$

ST-GAN simply adds some fully connected layers to  $D$  and the output of the final layer is regarded as the parameters of conditional distribution  $Q(c|x)$ . Finally, we replace the term  $I(c; G(z, c))$  with  $L_I(G, Q)$  for the objective function of ST-GAN, thus, the practical objective functions for  $G$  and  $D$  of ST-GAN is:

$$\begin{aligned} \min_G L_{GAN} &= \mathbb{E}_{x \sim P_{data}(x)} [D(x)] - \mathbb{E}_{z \sim P_z(z), c \sim P_c(c)} [D(G(z, c))] \\ &- \lambda_2 L_I(G, Q) \end{aligned} \quad (4)$$

$$\begin{aligned} \min_D L_{GAN} &= \mathbb{E}_{z \sim P_z(z), c \sim P_c(c)} [D(G(z, c))] - \mathbb{E}_{x \sim P_{data}(x)} [D(x)] \\ &+ \lambda_1 \mathbb{E}(t) - \lambda_2 L_I(G, Q) \end{aligned} \quad (5)$$

The practical objective functions for LST-GAN are the same as ST-GAN, except replacing  $Q(c|x)$  of  $L_I(G, Q)$  with  $Q(c|\tilde{x}_{local})$ , where  $\tilde{x}_{local} = F(G(z, c))$ .

Table 1: Inception-scores for VAE/GAN and ST-GAN, evaluated on 12800 images. the variances of these scores are very small value, thus they has strong credibility.

| Method                                       | Inception Score  |
|----------------------------------------------|------------------|
| VAE/GAN <a href="#">Larsen et al. (2015)</a> | 2.80±0.057       |
| ST-GAN                                       | <b>2.86±0.04</b> |
| CelebA dataset                               | 3.06±0.08        |

## Appendix C. Assessment of image quality

In this experiment, we compared generated samples quality of ST-GAN with VAE/GAN [Larsen et al. \(2015\)](#). We trained separately every method on the CelebA training dataset and used Inception score [Salimans et al. \(2016\)](#) to evaluate the sample quality in 12800 images. The comparison results are shown in Table 1 and the Inception score of the CelebA dataset is performed in the last row of Table 1. Comparisons show ST-GAN get better generated results than VAE/GAN.

## References

- David Barber and Felix Agakov. The im algorithm: a variational approach to information maximization. In *Proceedings of the 16th International Conference on Neural Information Processing Systems*, pages 201–208. MIT Press, 2003.
- Xi Chen, Yan Duan, Rein Houthoofd, John Schulman, Ilya Sutskever, and Pieter Abbeel. Infogan: Interpretable representation learning by information maximizing generative adversarial nets. In *Advances in Neural Information Processing Systems*, pages 2172–2180, 2016.
- Anders Boesen Lindbo Larsen, Søren Kaae Sønderby, Hugo Larochelle, and Ole Winther. Autoencoding beyond pixels using a learned similarity metric. *arXiv preprint arXiv:1512.09300*, 2015.
- Tim Salimans, Ian Goodfellow, Wojciech Zaremba, Vicki Cheung, Alec Radford, and Xi Chen. Improved techniques for training gans. In *Advances in Neural Information Processing Systems*, pages 2234–2242, 2016.
